# Supplementary material for: The first polyoxometalate-templated four-fold interpenetrated coordination polymer with new topology and ferroelectricity
Source: Royal Society of Chemistry journal article supplement (doi:10.1039/b916462f), 2009-10-19
Supplement: b916462f.pdf [file b916462f.pdf]

## Supporting Information

# A Polyoxometalate-Templated Fourfold Interpenetrated Coordination Polymer with New Topology

Shou-Tian Zheng,<sup>a</sup> Jie Zhang,<sup>b</sup> and Guo-Yu Yang<sup>\*,a,b</sup>

<sup>a</sup>State Key Laboratory of Structural Chemistry, Fujian Institute of Research on the Structure of Matter, Chinese Academy of Sciences, Fuzhou, Fujian 350002, China. Fax: +86-591/371-0051; E-mail: ygy@fjirsm.ac.cn; <sup>b</sup>Department of Chemistry, Beijing Institute of Technology, Beijing 100081, China

All chemicals employed in this study were analytical reagent. Elemental analyses of C, H and N were carried out with a Vario EL III elemental analyzer. ICP analyses of Si, Cu and W were conducted on an Ultima2 spectrometer. IR spectrum (KBr pellets) was recorded on an ABB Bomen MB 102 spectrometer. Susceptibility measurement was carried out in the temperature range 2-300 K at a magnetic field of 0.5T on polycrystalline samples with a Quantum Design PPMS-9T magnetometer. The measurement of the polarization-voltage curves was carried out on a single crystal with an aixACCT TF Analyzer 2000 system at room temperature.

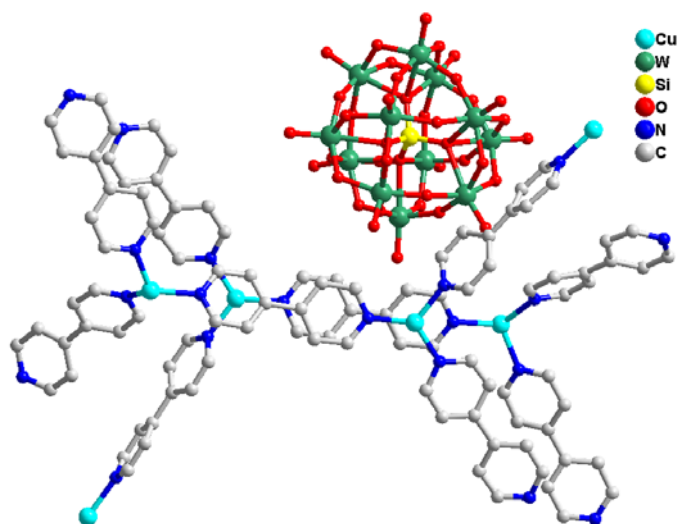

**Figure S1** View of asymmetric unit in **1**.

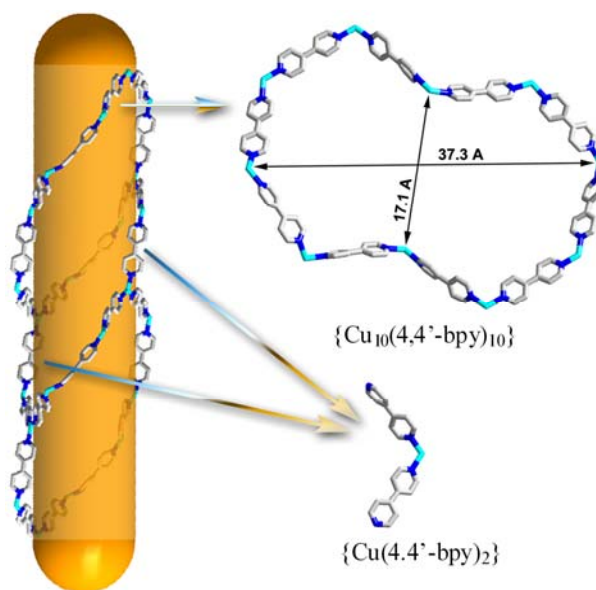

**Figure S2** View of the tube channel constructed from extra-large  $\{\text{Cu}_{10}(4,4'\text{-bpy})_{10}\}$  rings and  $\{\text{Cu}(4,4'\text{-bpy})_2\}$  bridges.

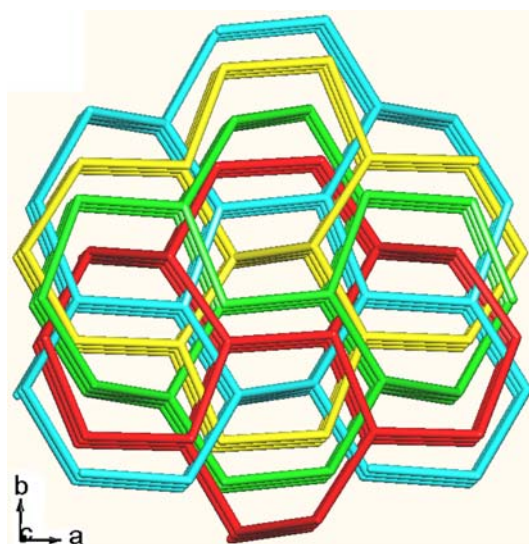

**Figure S3** View of the 3D 4-fold interpenetrating copper-organic framework.

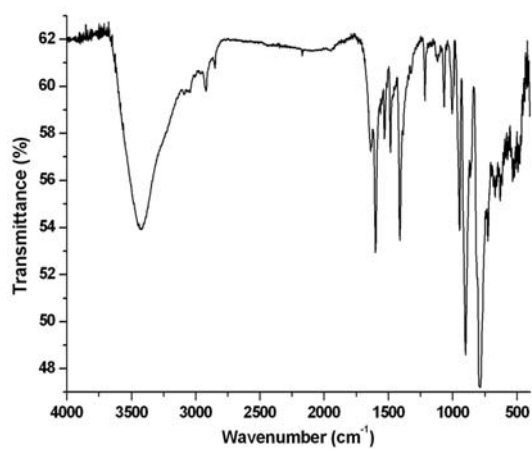

**Figure S4** IR spectrum of **1**.
